# Supplementary material for: Optical and molecular characteristics of urban wastewater dissolved organic matter: insights into their correlations
Source: Royal Society of Chemistry journal article supplement (doi:10.1039/d4ew00519h), 2024-01-01
Supplement: d4ew00519h1.pdf [file d4ew00519h1.pdf]

1

## Supplementary Information

2 **Optical and Molecular Characteristics of Urban Wastewater Dissolved**

3 **Organic Matter: Insights into Their Correlations**

4 Jiangyong Chu,<sup>ab</sup> Zhenliang Liao<sup>\*abc</sup>

5

6 <sup>a</sup> College of Environmental Science and Engineering, Tongji University, Shanghai, 200092, China

7 <sup>b</sup> UNEP-Tongji Institute of Environment for Sustainable Development, State Key Laboratory of

8 Pollution Control and Resource Reuse, Tongji University, Shanghai 200092, China

9 <sup>c</sup> College of Civil Engineering and Architecture, Xinjiang University, Urumqi 830047, China

10

11 **\* Corresponding author:** Zhenliang Liao; 04150@tongji.edu.cn

12

## 13 **Supplementary Information content**

14 S1 Sampling area

15 S2 TOC-VCPH analyzer detection settings

16 S3 CDOM parameters calculation

17 S4 FDOM parameters calculation

18 S5 EEM-PARAFAC modeling analysis

19 S6 Molecular parameters calculation

20 Figure S1-S10

21 References

## 22 **S1 Sampling area**

23 Urban domestic wastewater samples were collected in Shanghai, China (Yangpu District, Area:  
24 60.61 km<sup>2</sup>). Meteorological data were recorded, including rainfall (average 48.6 mm), relative  
25 humidity (about 94%), atmospheric pressure (average 29.40 mmHg), and surface temperature  
26 (average 23 °C). The detailed information on the sampling environment is similar to the  
27 stormwater samples, which have been described in detail <sup>1</sup>.

28

## 29 **S2 TOC-VCPH analyzer detection settings**

30 Instrument settings for TDN (Total dissolved organic nitrogen, TDN) and DOC (Dissolved  
31 organic carbon, DOC) detection are as follows: injection frequency of 1, cleaning frequency of 2,  
32 sample injection volume of 150 μL, acid addition of 1.5% of the sample injection volume, injection  
33 airflow of 80 ml, injection time of 1.5 min, automatic dilution of 1-fold, and maximum integration  
34 time of 4 min 50s.

35

## 36 **S3 CDOM parameters calculation**

37 CDOM spectral parameters analysis, the absorption at 350 nm ( $a_{350}$ ) is used to quantify the  
38 CDOM pool. The absorption coefficient ( $a_{CDOM}$ )<sup>2</sup> is obtained using the following equation:

39

$$40 \quad a_{CDOM}(\lambda) = 2.303 * a_{CDOM}(\lambda)/L \quad (1)$$

41

42  $a_{CDOM}(\lambda)$  is the absorbance of DOM containing chromophoric groups at wavelength  $\lambda$ , L is the

43 path length of the light pool in meters, and 2.303 is the conversion factor from common logarithm  
44 to natural logarithm. The equation for calculating the spectral slope coefficient ( $S$ ,  $\mu\text{m}$ )<sup>3</sup> is:

45

$$46 \quad a(\lambda) = a(\lambda_0) e^{S(\lambda_0 - \lambda)} + K \quad (2)$$

47

48 Where  $a(\lambda)$  is the absorption coefficient,  $\lambda_0$  is the reference wavelength,  $\lambda$  is the selected  
49 wavelength,  $a(\lambda_0)$  is the absorption coefficient at the reference wavelength, and  $K$  is the  
50 background parameter.

51 In addition, the spectral slope ratio ( $S_R$ )<sup>4</sup> is calculated as follows.

52

$$53 \quad S_R = S_{275-295} / S_{350-400} \quad (3)$$

54

55  $S_{275-295}$  and  $S_{350-400}$  are linear fittings of the logarithmic transformation absorption coefficients  
56 within the wavelength ranges of 275-295 nm and 350-400 nm, respectively, with units of  $\text{nm}^{-1}$ .

57  $S_R$  is commonly used for the characterization of molecular weight and aromaticity<sup>4</sup>. Specific UV-

58 vis absorbance at 254 and 280 nm ( $SUVA_{254}$  and  $SUVA_{280}$ ) are calculated by dividing the

59 absorbance at 254 and 280 nm by the concentration of dissolved organic carbon (DOC) and are

60 often used as indicators of aromaticity<sup>5</sup>.

61

$$62 \quad SUVA_{254} = a_{254} / \rho_{\text{DOC}} \quad (4)$$

63

64 SUVA<sub>254</sub> is the specific UV absorbance at 254 nm, with simplified units of L·mg<sup>-1</sup> m<sup>-1</sup>; a<sub>254</sub> is  
65 the absorption coefficient at a wavelength of 254 nm, with units of m<sup>-1</sup>; ρ<sub>DOC</sub> is the concentration  
66 of dissolved organic carbon (DOC) in the water sample, with units of mg·L<sup>-1</sup>.

67

#### 68 **S4 FDOM parameters calculation**

69 The specific formulas for calculating the three fluorescence optical parameters are as follows:

70

71 
$$FI = I_{470\text{nm}} / I_{520\text{nm}}, \lambda_{\text{Ex}}=370 \text{ nm (5)}$$

72 
$$BIX = I_{380\text{nm}} / I_{430\text{nm}}, \lambda_{\text{Ex}}=310 \text{ nm (6)}$$

73 
$$HIX = \sum I_{435-480\text{nm}} / \sum I_{300-345\text{nm}}, \lambda_{\text{Ex}}=254 \text{ nm (7)}$$

74

75 The fluorescence index (FI) is the ratio of fluorescence intensity at emission wavelengths of 470  
76 nm and 520 nm, respectively, to the excitation wavelength of 370 nm<sup>6,7</sup>. FI is used to indicate the  
77 source of dissolved organic matter (DOM), ranging from terrestrial sources (plant and soil organic  
78 matter, approximately 1.2) to microbial sources (bacterial and algal byproducts, approximately  
79 1.8). The biological index (BIX) is the ratio of fluorescence intensity at emission wavelengths of  
80 380 nm and 430 nm to the excitation wavelength of 310 nm<sup>8</sup>. BIX increases with the freshness of  
81 DOM<sup>8</sup>. The humification index (HIX) is the ratio of the integrated fluorescence intensity at  
82 emission wavelengths of 435-480 nm and 300-345 nm to the excitation wavelength of 254 nm (or  
83 255 nm in this study due to the 5 nm excitation interval of the spectrofluorometer), representing  
84 the degree of humification of DOM, which generally increases with increasing aromaticity<sup>9,10</sup>.

85

## 86 **S5 EEM-PARAFAC modeling analysis**

87 The combination EEM dataset of all collected samples was modeled using PARAFAC with  
88 drEEM in MATLAB<sup>11,12</sup>. The model was tested for repeated convergence using least squares and  
89 non-negative constraints on the data. To avoid the disproportionate impact of low signal-to-noise  
90 ratios on the modeling, excitation wavelengths below 250 nm and emission wavelengths above  
91 600 nm were removed<sup>11</sup>. Prior to PRAAFAC analysis, spectral regions without fluorescence and  
92 affected by first- and second-order Raman scattering peaks were removed and replaced with  
93 missing values. The PARAFAC model was validated through residual analysis, split-half analysis,  
94 random initialization, sum of squares error, explained variance, and core consistency tests,  
95 explaining over 99.7% of the total fluorescence variance. The content of each component was  
96 determined based on the Fmax of identified components. The emission and excitation load of the  
97 identified components were compared with those in the open fluorescence database, OpenFluor  
98 (<https://openfluor.lablicate.com>). The PARAFAC model was further compared and validated  
99 using Tucker's congruence coefficient (TCC, TCC Ex/Em > 0.95). PARAFAC modeling was  
100 performed using the DOM-Fluor toolbox in MATLAB R2022a ([www.models.kvl.dk/source](http://www.models.kvl.dk/source))<sup>13</sup>.

101

## 102 **S6 Molecular parameters calculation**

103 In addition, the double bond equivalent (DBE), the modified aromaticity index ( $AI_{mod}$ ), and the  
104 nominal oxidation state of carbon (NOSC) were calculated as characterization parameters for  
105 DOM molecular features<sup>14,15</sup>. DBE represents the unsaturation of DOM molecules<sup>14</sup>. A higher  
106 DBE value indicates greater diversity and more double bonds and aromatic rings in the compounds  
107<sup>14</sup>.  $AI_{mod}$  represents the modified aromaticity index of DOM molecules<sup>16</sup>, estimating the

108 proportion of aromatic and condensed aromatic structures, and considering the abundance of  
 109 carboxylic groups in natural organic matter <sup>14</sup>. NOSC represents the nominal oxidation state of  
 110 carbon, which is used to describe the oxidation state or degree of carbon atoms in organic  
 111 compounds. The nominal oxidation state of carbon is estimated for each carbon atom in the  
 112 compound <sup>15</sup>. Weight average (wa) represents the weighted average based on the mass spectral  
 113 ion intensities (Schmidt et al., 2017).

114 The specific calculation formulas are as follows:

$$DBE = 1 + \frac{2C - H + N + P}{2} \quad (8)$$

$$AI_{mod} = \frac{1 + C - 0.5O - S - 0.5H}{2C - 0.5O - S - N - P} \quad (9)$$

$$(NOSC - O) = 4 - \frac{4C + H - 3N - 2O + 5P - 2S}{C} \quad (10)$$

C, H, N, P, and S refer to the number of Carbon, Hydrogen, Nitrogen, Phosphorus, and Sulfur atoms in the molecular formula.

$$X = \frac{\sum_{i=1}^n X_i * I_i}{\sum_{i=1}^n I_i} \quad (11)$$

$X_i$  represents the corresponding value in each molecule, and  $I_i$  represents the peak intensity of the molecule in the mass spectrum.

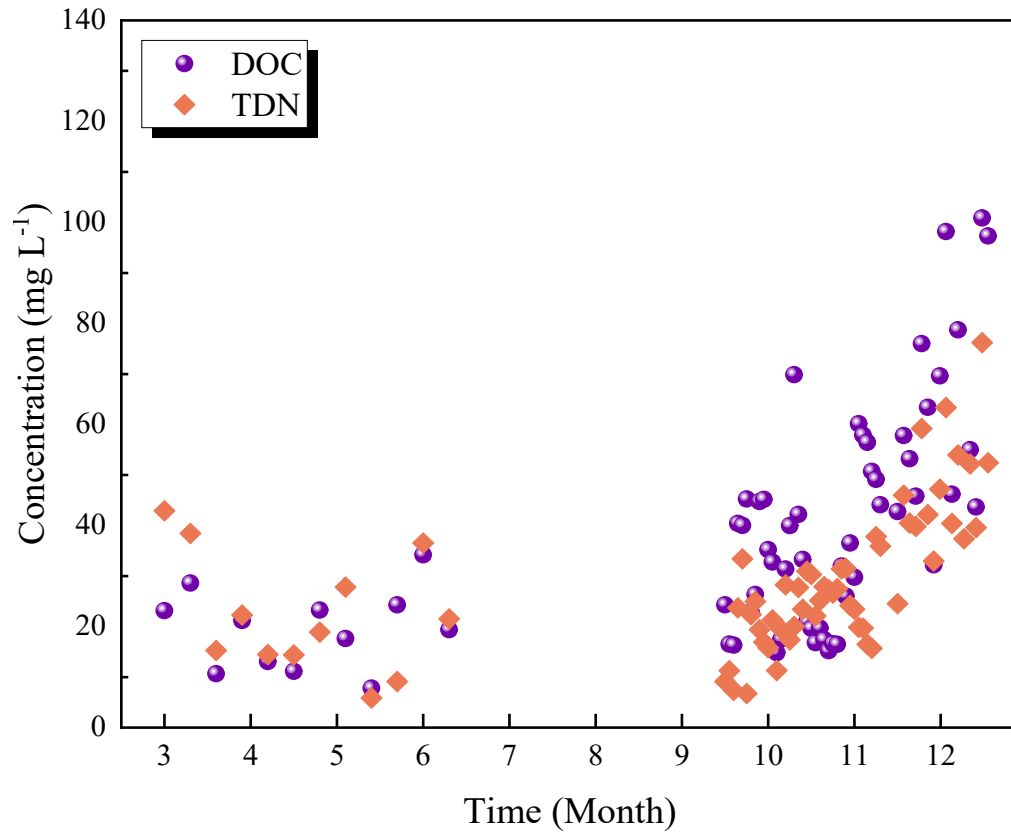

**Fig. S1** The content of dissolved organic carbon (DOC) and total dissolved nitrogen (TDN) in urban domestic wastewater at different periods.



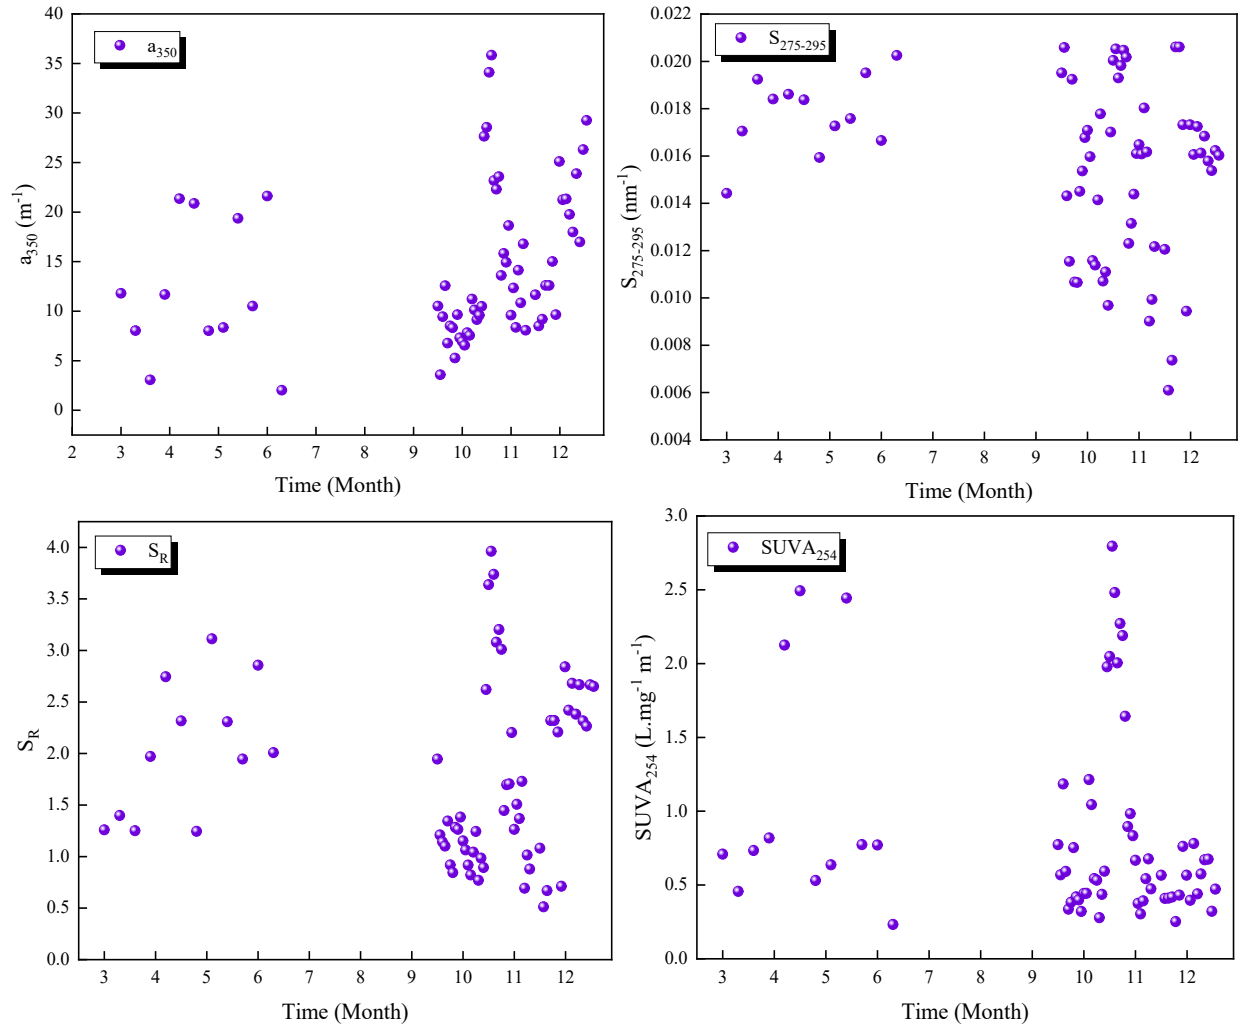

**Fig. S2** The CDOM optical parameters ( $a_{350}$ ,  $S_{275-295}$ ,  $S_R$ , and  $SUVA_{254}$ ) of urban domestic wastewater at different periods.

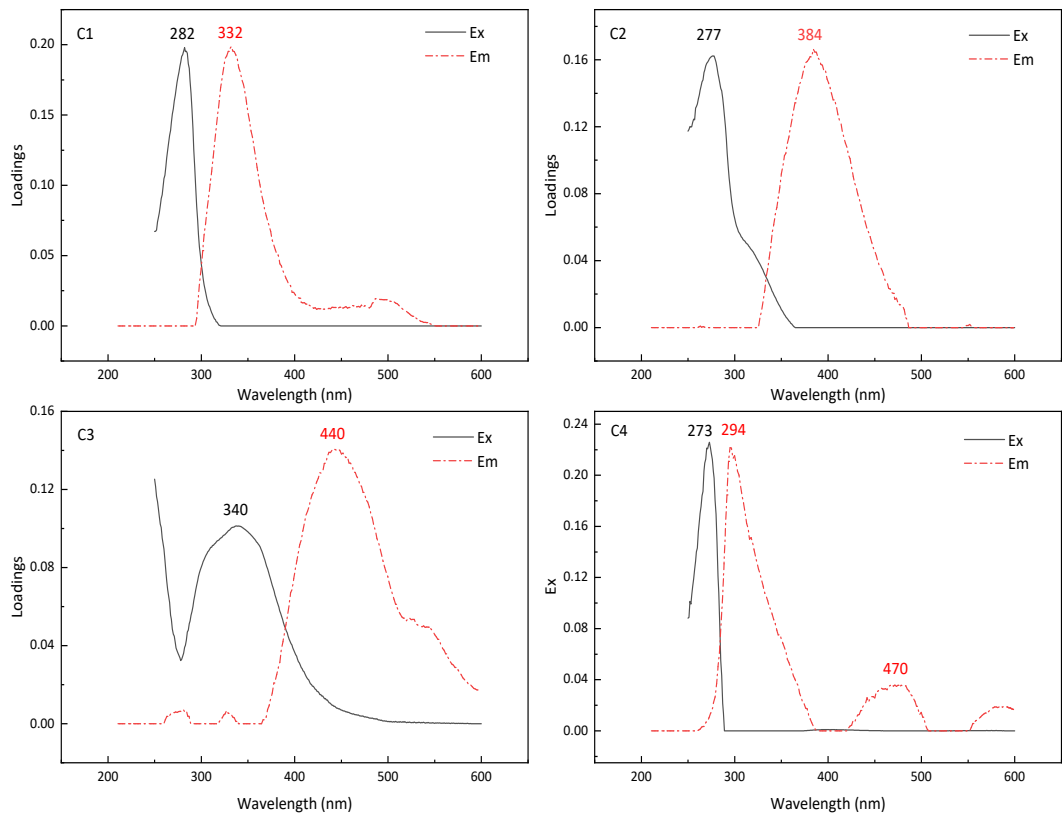

**Fig. S3** The excitation and emission spectra of fluorescent components C1–C4 identified by EEM-PARAFAC. The numbers indicate the peak wavelengths.

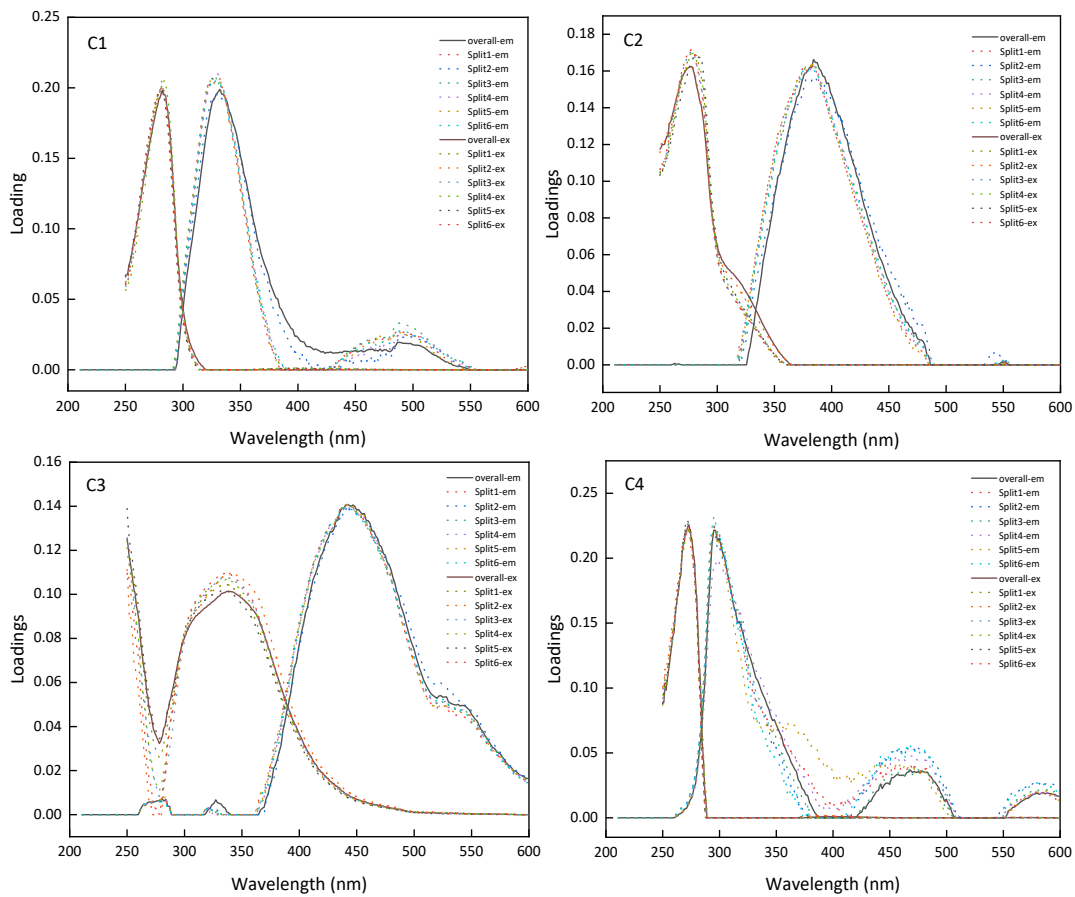

**Fig. S4** Half Split-validation of the four fluorescent components of the urban domestic wastewater.

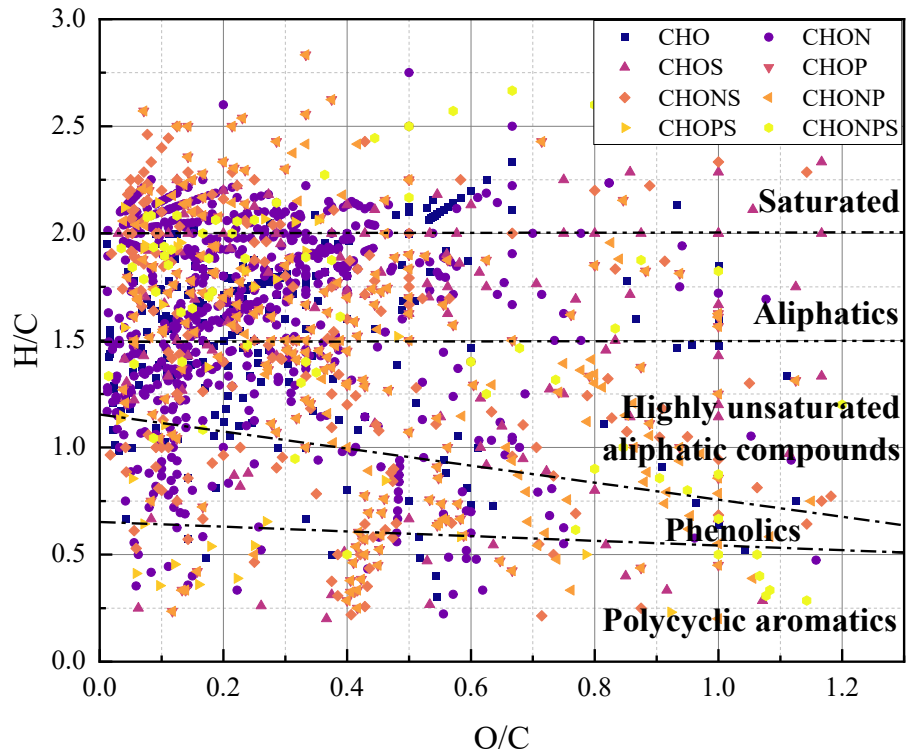

**Fig. S5** The Van Krevelen diagram of compound classes in DOM from urban domestic wastewater. Lines separating compound categories are for visualization and exact categorization may differ.

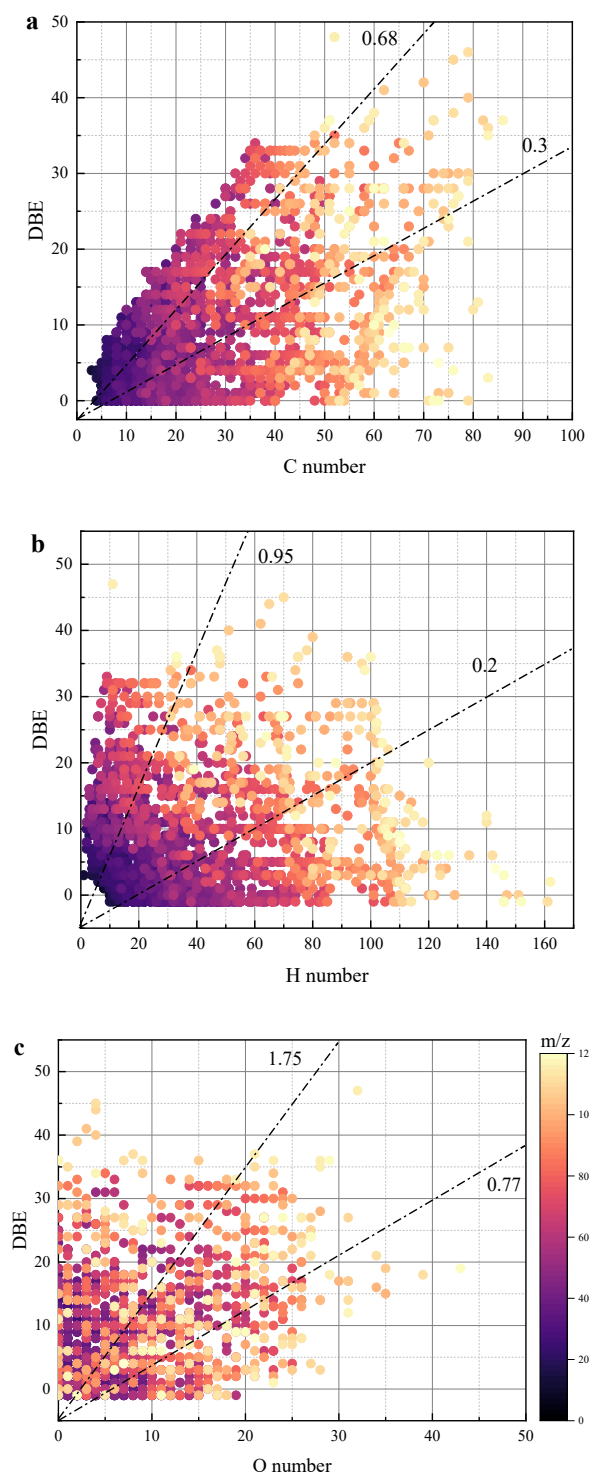

**Fig. S6** Molecular DBE vs. C (a), H (b), and O (c) for all molecular formulae. The color scale represents the m/z ratio.

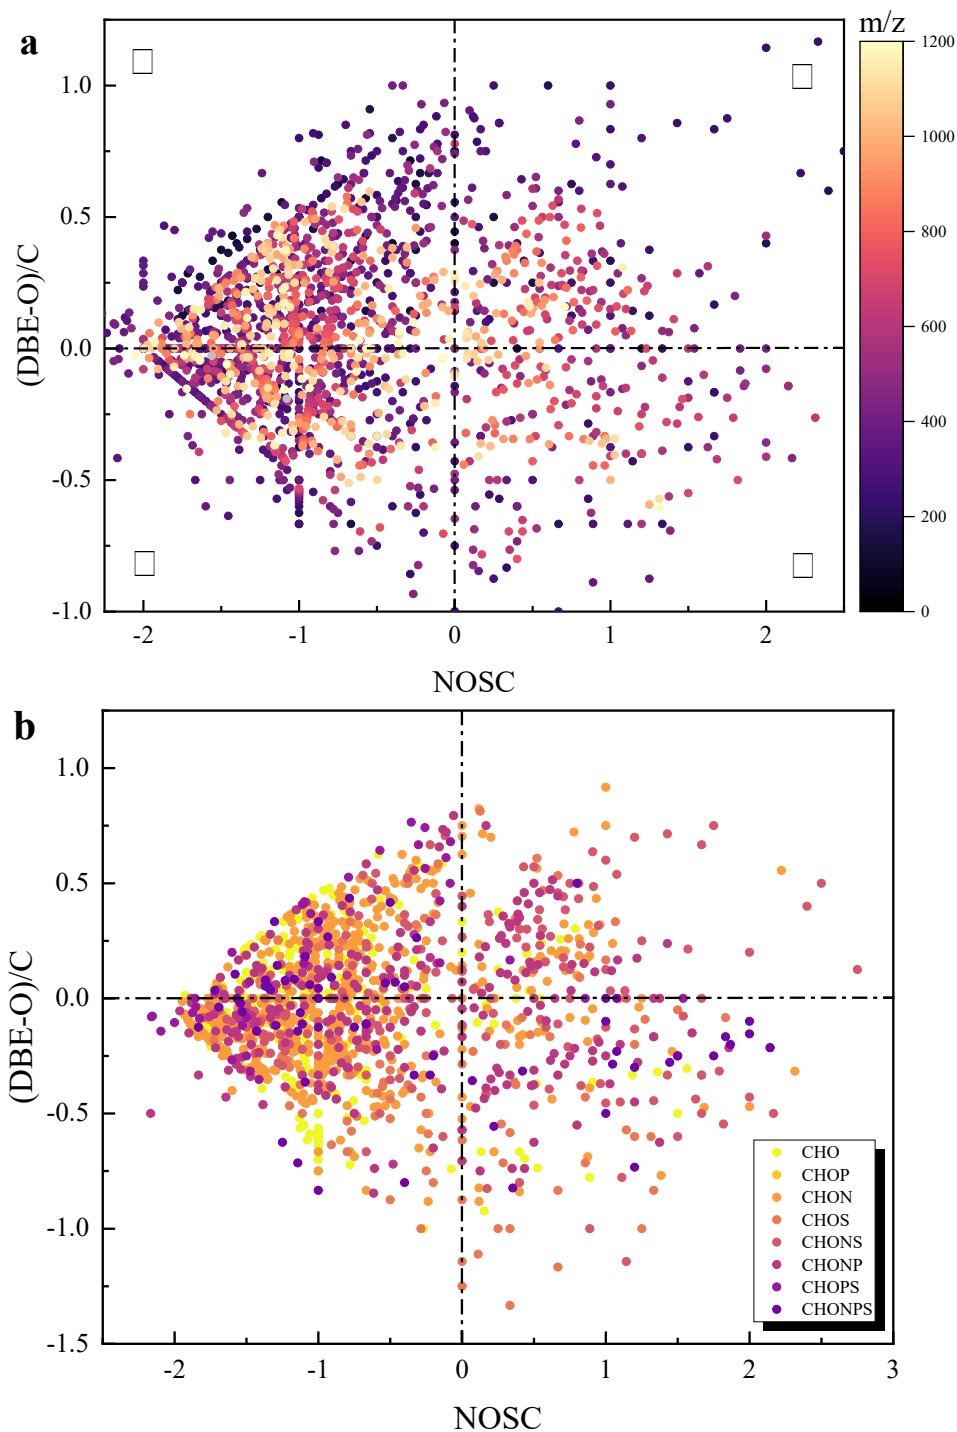

**Fig. S7** NOSC vs (DBE-O)/C diagrams of urban domestic wastewater-derived DOM (the third dimension is respectively (a)  $m/z$  and (b) molecular composition). The four regions represent different compound classes: ① unsaturated and oxidized compounds, ② unsaturated and reduced compounds, ③ saturated and reduced compounds, and ④ saturated and oxidized compounds.

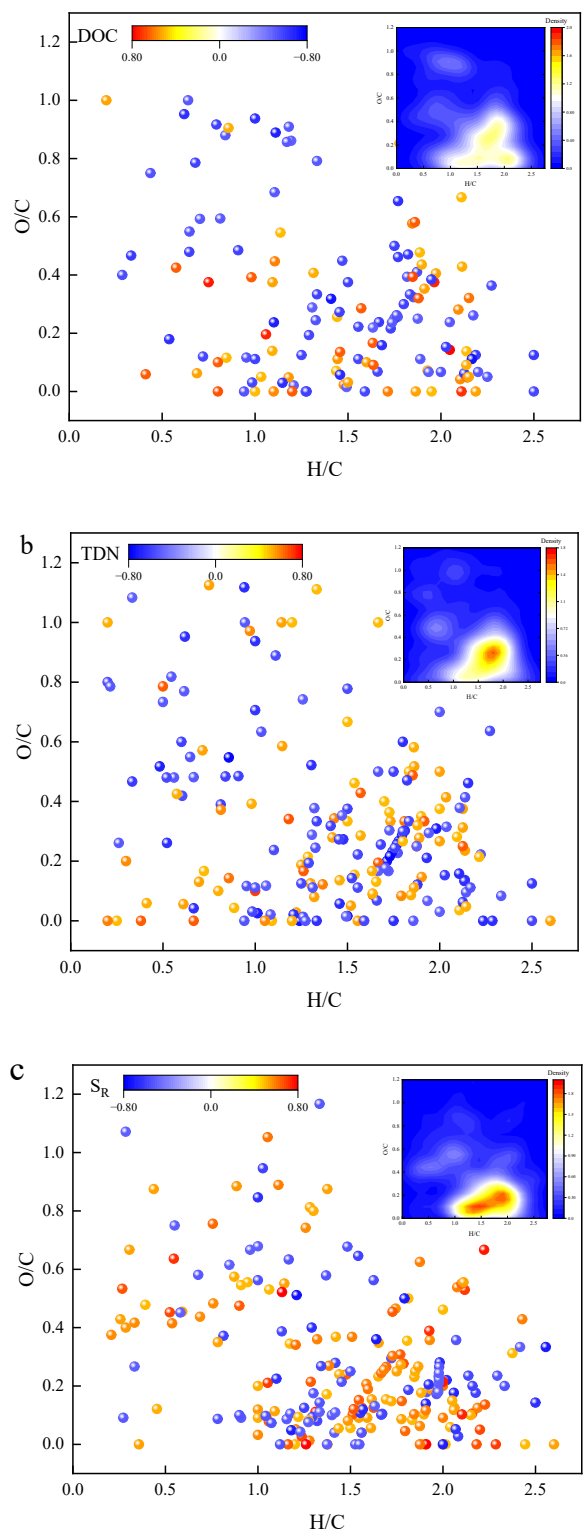

**Fig. S8** The correlation between photochemical parameters (DOC, TDN, and  $S_R$ ) and mass spectrometry molecules ( $p < 0.05$ ), as well as the distribution density of correlated molecules.

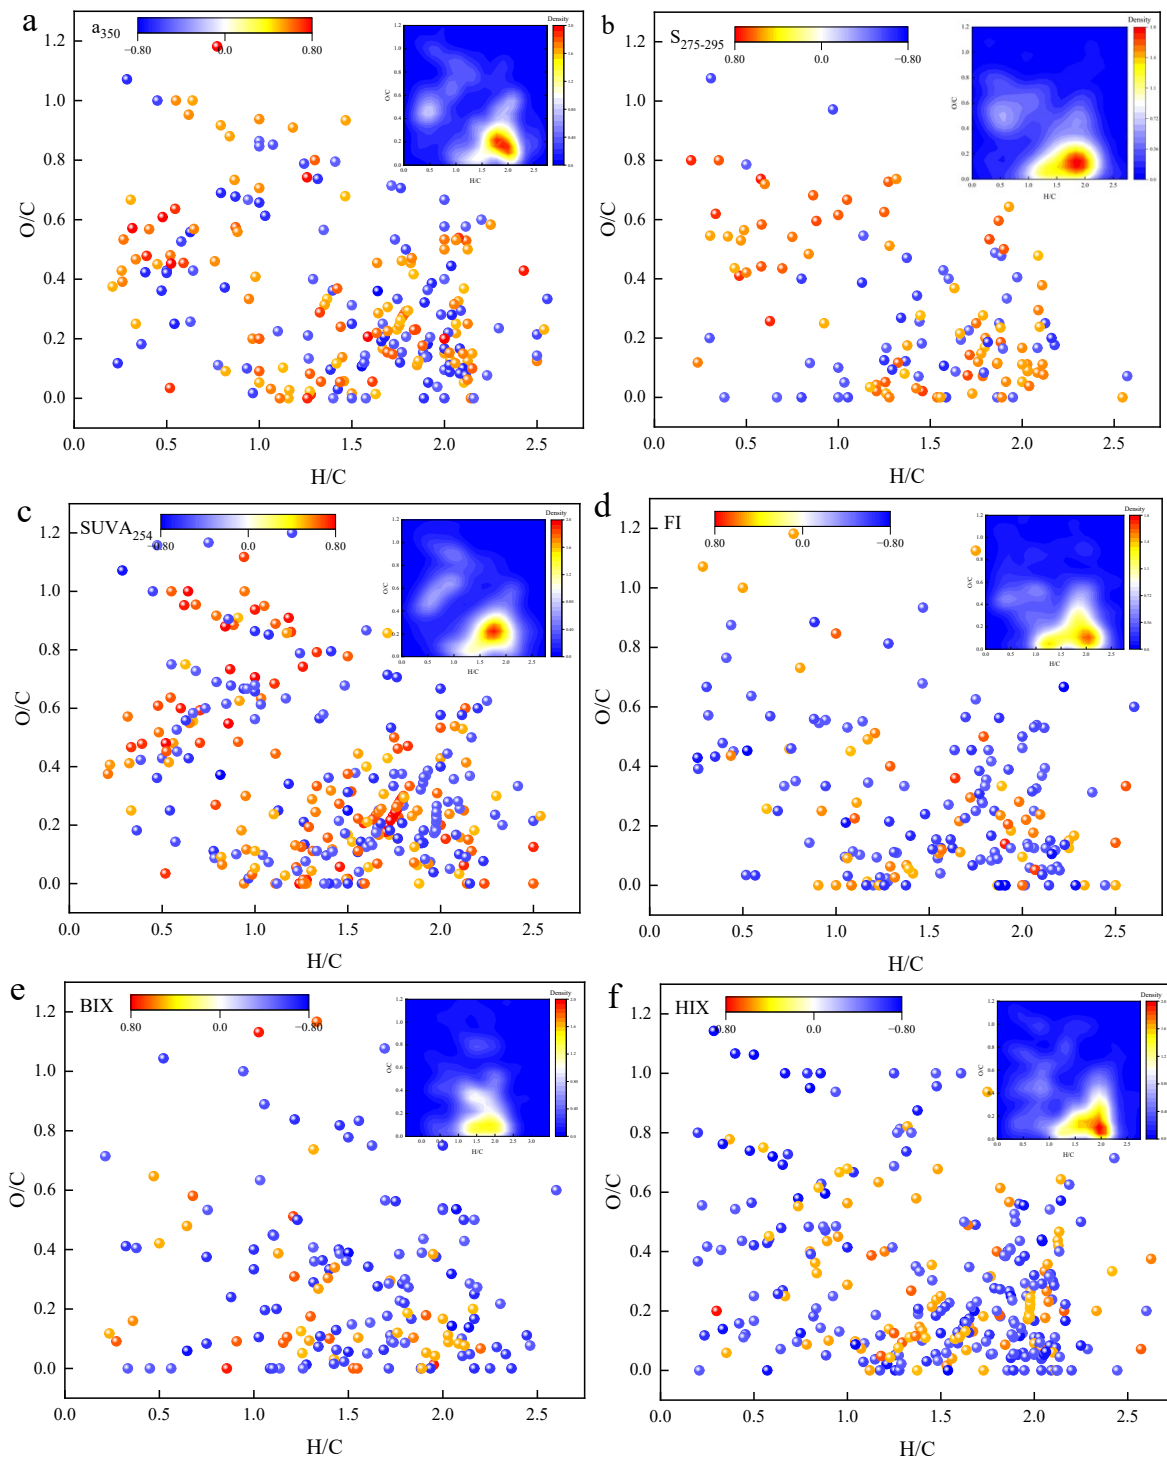

**Fig. S9** The correlation between optical parameters (a:  $a_{350}$ , b:  $S_{275-295}$ , c:  $SUVA_{254}$ , d: FI, e: BIX, f: HIX) and molecules detected by UPLC-Q-TOF-MS ( $p < 0.05$ ), as well as the distribution density of correlated molecules.



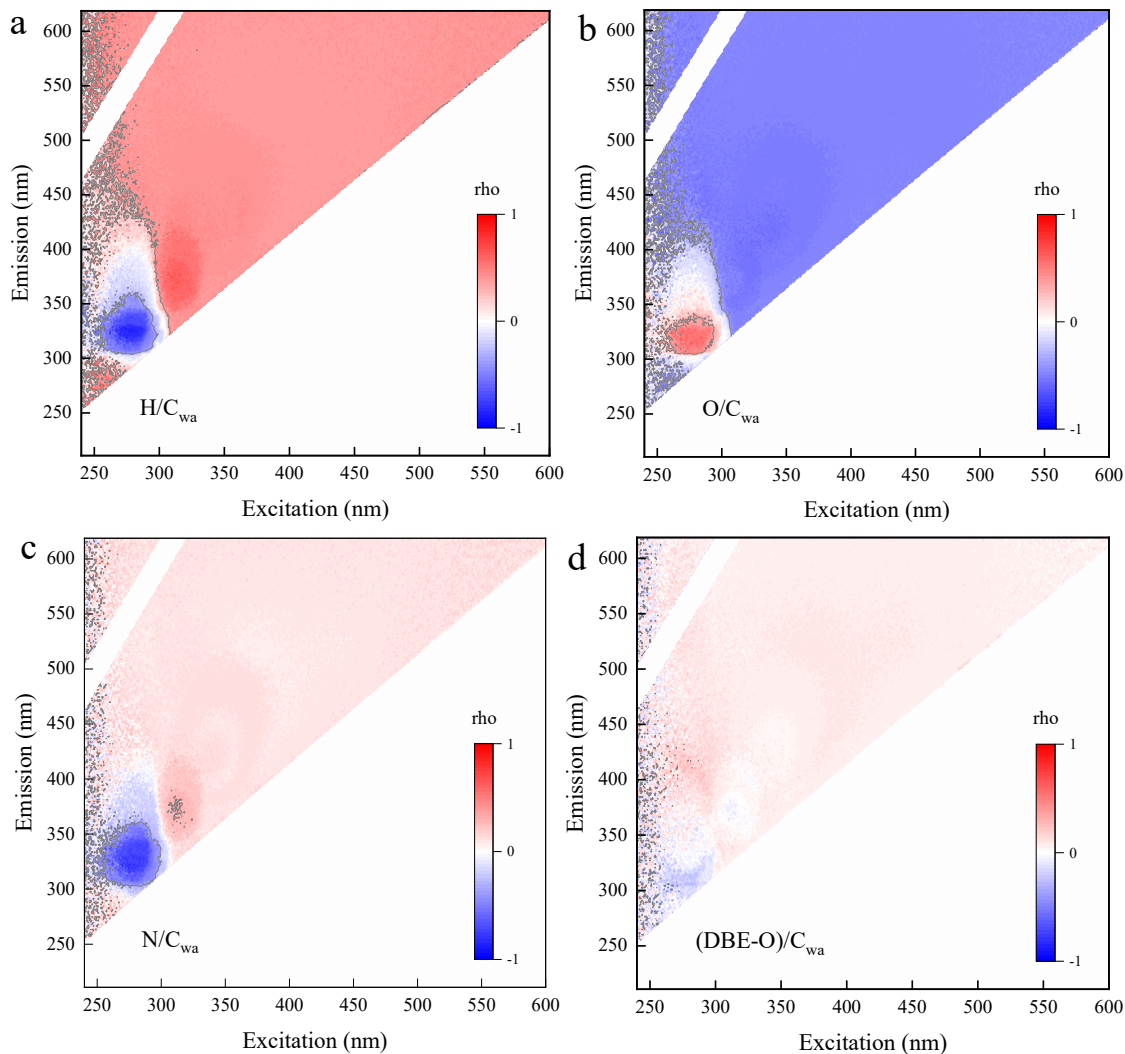

**Fig. S10** The correlation between molecular indices (a:  $H/C_{wa}$ , b:  $O/C_{wa}$ , c:  $N/C_{wa}$  and d:  $(DBE-O)/C_{wa}$ ) of DOM in domestic wastewater detected by UPLC-Q-TOF-MS and emission-excitation matrices (wa means weight average based on the molecules intensity).

## References

- 1 Z. Liao, J. Chu, C. Luo and H. Chen, Revealing the characteristics of dissolved organic matter in urban runoff at three typical regions via optical indices and molecular composition, *J. Environ. Sci.*, 2021, **108**, 8–21.
- 2 C. Hu, F. E. Muller-Karger and R. G. Zepp, Absorbance, absorption coefficient, and apparent quantum yield: A comment on common ambiguity in the use of these optical concepts. *Limnol. Oceanogr.*, 2002, **47**, 1261–1267.
- 3 C. A. Stedmon, S. Markager and H. Kaas, Optical properties and signatures of chromophoric dissolved organic matter (CDOM) in Danish coastal waters. *Estuar. Coast. Shelf Sci.*, 2000, **51**, 267–278.
- 4 J. R. Helms, A. Stubbins, J. D. Ritchie, E. C. Minor, D. J. Kieber and K. Mopper, Absorption spectral slopes and slope ratios as indicators of molecular weight, source, and photobleaching of chromophoric dissolved organic matter. *Limnol. Oceanogr.*, 2008, **53**, 955–969.
- 5 J. L. Weishaar, G. R. Aiken, B. A. Bergamaschi, M. S. Fram, R. Fujii and K. Mopper, Evaluation of specific ultraviolet absorbance as an indicator of the chemical composition and reactivity of dissolved organic carbon, *Environ. Sci. Technol.*, 2003, **37**, 4702–4708.
- 6 R. M. Cory, M. P. Miller, D. M. McKnight, J. J. Guerard and P. L. Miller, Effect of instrument-specific response on the analysis of fulvic acid fluorescence spectra, *Limnol. Oceanogr. Methods*, 2010, **8**, 67–78.
- 7 D. M. McKnight, E. W. Boyer, P. K. Westerhoff, P. T. Doran, T. Kulbe and D. T. Andersen, Spectrofluorometric characterization of dissolved organic matter for indication of precursor organic material and aromaticity, *Limnol. Oceanogr.*, 2001, **46**, 38–48.
- 8 A. Huguet, L. Vacher, S. Relexans, S. Saubusse, J. M. Froidefond and E. Parlanti, Properties of fluorescent dissolved organic matter in the Gironde Estuary, *Org. Geochem.*, 2009, **40**, 706–719.
- 9 T. Ohno, Fluorescence inner-filtering correction for determining the humification index of dissolved organic matter, *Environ. Sci. Technol.*, 2002, **36**, 742–746.
- 10 A. Zsolnay, E. Baigar, M. Jimenez, B. Steinweg and F. Saccomandi, Differentiating with fluorescence spectroscopy the sources of dissolved organic matter in soils subjected to drying, *Chemosphere*, 1999, **38**, 45–50.
- 11 K. R. Murphy, C. A. Stedmon, D. Graeber and R. Bro, Fluorescence spectroscopy and multi-way techniques. PARAFAC, *Anal. Methods*, 2013, **5**, 6557–6566.
- 12 C. A. Stedmon and R. Bro, Characterizing dissolved organic matter fluorescence with parallel factor analysis: A tutorial, *Limnol. Oceanogr. Methods*, 2008, **6**, 572–579.
- 13 C. J. Williams, Y. Yamashita, H. F. Wilson, R. Jaffe and M. A. Xenopoulos, Unraveling the role of land use and microbial activity in shaping dissolved organic matter characteristics in stream ecosystems, *Limnol. Oceanogr.*, 2010, **55**, 1159–1171.
- 14 B. P. Koch and T. Dittmar, From mass to structure: An aromaticity index for high-resolution mass data of natural organic matter, *Rapid Commun. Mass Spectrom.*, 2006, **20**, 926–932.
- 15 D. E. LaRowe and P. Van Cappellen, Degradation of natural organic matter: A thermodynamic analysis, *Geochim. Cosmochim. Acta*, 2011, **75**, 2030–2042.
- 16 M. Seidel, M. Beck, T. Riedel, H. Waska, I. G. N. A. Suryaputra, B. Schnetger, J. Niggemann, M. Simon and T. Dittmar, Biogeochemistry of dissolved organic matter in an anoxic intertidal creek bank, *Geochim. Cosmochim. Acta*, 2014, **140**, 418–434.
